# Supplementary material
Source: Elsevier journal article supplement (https://www.sciencedirect.com/science/article/pii/S0214916822000195)
Supplement: mmc1 [file S0214916822000195:mmc1.xlsx]

## Sheet: A. Perfil Participante-General
				Dominio A: Perfil de participante - General
				Por favor, indique los siguientes datos relacionados con su propio perfil y el de su lugar de trabajo habitual:
					1) Edad:			años
					2) Especialidad:
					Indicar la especialidad
					3) Comunidad Autónoma en la que ejerce su actividad asistencial principal:
					4) Información del centro en el que ejerce su actividad asistencial principal:
					a) Tipo de centro:
					b) Perfil del centro:

## Sheet: A. Perfil Participante-Cardio
				Dominio A: Perfil de participante - Si la especialidad es Cardiología
				Por favor, indique los siguientes datos relacionados con su lugar de trabajo habitual:
					1) ¿Dispone su hospital de unidad de rehabilitación cardiaca?
					1.1) En caso afirmativo:
					1.1.1) Del total de pacientes que tienen un evento CV ¿qué porcentaje accede a la unidad de RC?			%
					1.1.2) La unidad de RC, ¿tiene capacidad para rehabilitar a todos los pacientes con indicación sea de forma presencial o e-supervisado*?
					1.2) En caso negativo:
					1.2.1. ¿tiene su servicio una unidad de RC proyectada en los próximos 1-2 años?
					2) ¿Dispone su servicio de cardiología de consulta de enfermería de prevención y RC?
					3) ¿Cuál es el número anual de ingresos por Síndrome Coronario Agudo (SCA) en el hospital?			n ingresos SCA / año
					*Remoto/ a distancia.

## Sheet: A. Perfil Participante-MI-Endo
				Dominio A: Perfil de participante - Si la especialidad es Medicina Interna o Endocrinología
				Por favor, indique los siguientes datos relacionados con su lugar de trabajo habitual:
					1) ¿Cuenta con una unidad de lípidos en su centro o área?
					1.1) En caso afirmativo:
					1.1.1) ¿Está acreditada por la SEA?
					1.1.2) ¿Pertenece usted a la unidad?
					2) ¿Cuántos médicos especializados en lípidos trabajan en su servicio del hospital?			n médicos en el Servicio (incluye residentes)

## Sheet: A. Perfil Participante-AP
				Dominio A: Perfil de participante - Si la especialidad es Atención Primaria
				Por favor, indique los siguientes datos relacionados con su lugar de trabajo habitual:
					1) En los pacientes con hipercolesterolemia y alto o muy alto RCV, que atiende usted habitualmente, ¿Qué porcentaje suele derivar a otros Servicios para que hagan su manejo principal?
					Unidad de Lípidos			%
					Atención especializada (Hospital, diferente a la Unidad de Lípidos)			%
					Otro centro o especialidad (p.e. enfermería, dietista, etc)			%
					NO derivados (seguimiento pleno en AP)			%
					Especificar servicio hospitalario al que los remite		0

## Sheet: B. Carga asistencial
				Dominio B: Carga asistencial que supone la hipercolesterolemia
				De conformidad con su experiencia y práctica clínica habitual y pensando en el centro en el que realice su actividad asistencial principal…. Indique:
					1) ¿Cuántos pacientes suele visitar semanalmente en consulta en término medio (por cualquier causa)?:			n pacientes / semana
					2) Del número total de pacientes que visita semanalmente, ¿Qué porcentaje se encuentra tratado con algún hipolipemiante?			%
					3) ¿Cuál es la distribución (%) de pacientes con dislipemia atendidos en su consulta habitualmente?
						Pacientes (%)
					Prevención primaria (sin DM)		%
					Prevención primaria + DM		%
					Prevención secundaria: paciente con un único evento CV		%
					Prevención secundaria: paciente con múltiples eventos CV (>1 evento o polivascular)		%
					Hipercolesterolemia Familiar (prevención primaria + secundaria)		%
						0
					3) Del total de pacientes con hipercolesterolemia familiar, ¿Qué porcentaje se encuentra en prevención primaria?			%
					El resto se asume en prevención secundaria

## Sheet: C. Ruta asistencial
				Dominio C: Ruta asistencial de los pacientes con hipercolesterolemia
				De acuerdo con su práctica clínica habitual y pensando en los pacientes con hipercolesterolemia a los que atiende:
					1) En su práctica clínica habitual, para establecer el manejo de los pacientes con hipercolesterolemia, ¿cuáles son las principales directrices o recomendaciones que considera?:
					Indicar con "x" todas las respuestas aplicables
						Utilización SIEMPRE O CASI SIEMPRE en práctica clínica
						Diagnóstico	Definición de objetivos terapéuticos	Monitorización del paciente	Tratamiento	No disponible / No uso
					Guía ESC/EAS 2019
					Guía ESC/EAS 2016 sobre el tratamiento de las dislipemias
					Manejo de las dislipemias en Atención Primaria (SemFYC)
					Documento de consenso de la Sociedad Española de Cardiología
					Guía o protocolo asistencial de la Comunidad Autónoma
					Guía o protocolo asistencial del centro
					Informe de Posicionamiento Terapéutico
					Guía Farmacoterapéutica de la Comunidad Autónoma
					Guía Farmacoterapéutica del centro
					Otra (especificar debajo)

## Sheet: D. Riesgo Cardiovascular
				Dominio D: Valoración del riesgo cardiovascular y definición de objetivos terapéuticos en pacientes con hipercolesterolemia
						1) De acuerdo con su práctica clínica habitual, en los pacientes con hipercolesterolemia, ¿con qué frecuencia suele valorar su riesgo cardiovascular (RCV)?
							Valoración RCV
							Al Diagnóstico	De rutina en visitas seguimiento
						Prevención primaria (sin DM)
						Prevención primaria + DM
						Hipercolesterolemia Familiar
						CV – Cardiovascular; cLDL - colesterol LDL (low-density lipoprotein / lipoproteínas de baja densidad); DM – Diabetes Mellitus; HF - hipercolesterolemia familiar
						2) ¿Qué escala de riesgo utiliza PRINCIPALMENTE para valorar el RCV?
						Especificar escala empleada para valorar el RCV
						3) De acuerdo con su práctica clínica habitual, ¿cómo suelen distribuirse los pacientes (%) a los que visita, según su perfil de RCV?
							Distribución (%) de pacientes según RCV*
							RCV Bajo	RCV Moderado	RCV Alto	RCV Muy alto	Total	N/A
						Prevención primaria (sin DM)					0
						Prevención primaria + DM					0
						Prevención secundaria					0
						Hipercolesterolemia Familiar					0
						RCV – Riesgo Cardiovascular; DM – Diabetes Mellitus *La suma de las distribuciones de cada uno de los perfiles debe ser 100%
						4) En su centro o área sanitaria, los resultados de laboratorio referidos al LDL-c… ¿tienen en cuenta el RCV del paciente en su valor umbral para hipercolesterolemia?
						En caso AFIRMATIVO: 4.1) Indique los valores de referencia (LDL-c mg/dL) utilizados por el laboratorio para considerar hipercolesterolemia:
							RCV Bajo	RCV Moderado	RCV Alto	RCV Muy alto
						LDL-c (mg/dL)
						RCV – Riesgo Cardiovascular; DM – Diabetes Mellitus
						En caso NEGATIVO: 4.2) Indique el valor de referencia (LDL-c mg/dL) utilizado por el laboratorio para considerar hipercolesterolemia:
							General
						LDL-c (mg/dL)
						RCV – Riesgo Cardiovascular; DM – Diabetes Mellitus
						5) De acuerdo con su práctica clínica habitual, ¿cuál es la concentración de LDL-c (mg/dL) que suele considerar como OBJETIVO A ALCANZAR?
							LDL-c (mg/dL) DEFINIDO COMO OBJETIVO, según RCV
							RCV Bajo	RCV Moderado	RCV Alto	RCV Muy alto
						Prevención primaria (sin DM)
						Prevención primaria + DM
						Prevención secundaria: paciente con evento único
						Prevención secundaria: paciente con múltiples eventos CV (>1 evento o polivascular)
						Hipercolesterolemia Familiar
						LDL-c - colesterol LDL (low-density lipoprotein / lipoproteínas de baja densidad); DM – Diabetes Mellitus
						6) De acuerdo con su práctica clínica habitual, y teniendo en cuenta la máxima terapia hipolipemiante que tiene disponible…. Indique el LDL-c con el que puede o debe considerar que un paciente está "CONTROLADO":
							LDL-c (mg/dL) alcanzable en práctica clínica habitual
							RCV Bajo	RCV Moderado	RCV Alto	RCV Muy alto
						Prevención primaria (sin DM)
						Prevención primaria + DM
						Prevención secundaria: paciente con evento único
						Prevención secundaria: paciente con múltiples eventos CV (>1 evento o polivascular)
						Hipercolesterolemia Familiar
						LDL-c - colesterol LDL (low-density lipoprotein / lipoproteínas de baja densidad); DM – Diabetes Mellitus

## Sheet: E. Planificación de tratamiento
				Dominio E: Planificación de tratamiento en pacientes con hipercolesterolemia
					1) Pensando en los tratamientos para la hipercolesterolemia en España, ¿Existe alguna directriz o restricción de uso en su Comunidad Autónoma o centro?
						Directrices de uso	En caso afirmativo, especifique brevemente en qué consisten las condiciones:
					Estatinas
					Ezetimiba
					Inhibidores de la PCSK9
					2) Pensando en los pacientes con SCA… indique la pauta terapéutica que prescribe o con la que le llegan prescrita AL ALTA HOSPITALARIA:
					Tipo de fármaco (elija de la lista, todos los que proceda)	Pacientes (%)
						0
					3) En el caso de pacientes que llegan derivados de otro centro o especialidad, ¿es habitual que se produzcan cambios de tratamiento?
					Tipo de derivación	Cambio de tratamiento hipolipemiante*
					Paciente de AP derivado a AH
					Paciente de AH derivado hacia AP
					Paciente derivado entre distintos servicios en AH
					AP – Atención Primaria; AH – Atención Hospitalaria * Por cambio de tratamiento se entiende un cambio a otro producto, la adición de un tratamiento concomitante o el cambio en la dosis.
					4) De acuerdo con su experiencia, ¿cuáles son las principales causas de cambio de tratamiento?
					Motivos de cambio de tratamiento	Frecuencia
					Falta de control LDL-c
					Mejora en la seguridad
					Mejora de la tolerabilidad
					Preferencias del paciente
					Adaptación a guías o protocolos
					Indicadores / objetivos de prescripción
					Otra (especificar debajo)
					5) En su práctica clínica habitual, ¿cuál es el porcentaje aproximado de pacientes con hipercolesterolemia que son intolerantes a estatinas?						%

## Sheet: F. Control
				Dominio F: Control de la hipercolesterolemia
					1) Del total de pacientes con hipercolesterolemia que visita… ¿qué porcentaje de los mismos se encuentra controlado?
						Pacientes controlados (criterio clínico)
					RCV bajo		%
					RCV moderado		%
					RCV alto		%
					RCV muy alto		%
					RCV – Riesgo Cardiovascular; DM – Diabetes Mellitus
						Pacientes controlados (Guía ESC/EAS 2019)
					RCV bajo	LDL-C <116		%
					RCV moderado	LDL-C <100		%
					RCV alto	LDL-C <70		%
					RCV muy alto	LDL-C <55		%
					RCV – Riesgo Cardiovascular; DM – Diabetes Mellitus
					2) Del total de pacientes con hipercolesterolemia a los que visita, ¿qué porcentaje aproximado está en tratamiento con uno de los tipos de tratamiento disponibles?, Y ¿qué porcentaje se encuentra controlado?
						Pacientes en tratamiento con… (%)*	Controlados a criterio clínico (%)	Controlados según Guía ESC/EAS 2019 (%)
					Estatina en monoterapia (alta intensidad)
					Estatina en monoterapia (NO alta intensidad)
					Estatina + Ezetimiba
					Ezetimiba en monoterapia
					iPCSK9 + estatina
					iPCSK9 + estatina + ezetimiba
					Otra molécula o combinación (especificar a la derecha)
					Otra molécula o combinación (especificar a la derecha)
					No tratado
					*La suma del porcentaje de pacientes en tratamiento debe ser 100%.	0

## Sheet: G. RWE
				Dominio G: Real World Evidence
					De acuerdo con su práctica clínica habitual, y con el fin de disponer de una visión más próxima a la realidad asistencial de las dislipemias en España, le rogamos que nos indique algunos datos correspondientes a los últimos 10 pacientes con hipercolesterolemia que ha visitado en su consulta
					1) De los 10 últimos pacientes con dislipemia, visitados en consulta, indique:
						Tipo de paciente	¿El paciente tiene Hipercolesterolemia Familiar?	¿El paciente tiene DM?	¿El paciente tiene Insuficiencia Renal Crónica?	Perfil de RCV	Tratamiento hipolipemiante	Rango de LDL-c en el que el paciente se encuentra en la última visita	¿Se ha hecho cambio de tratamiento en la visita?	Tratamiento hipolipemiante que queda tras la última visita (en caso de que haya cambiado)	Derivación a otro Servicio o unidad	PACIENTES NO TRATADOS: motivo por el que NO lo están o estaban
					Paciente 1
					Paciente 2
					Paciente 3
					Paciente 4
					Paciente 5
					Paciente 6
					Paciente 7
					Paciente 8
					Paciente 9
					Paciente 10

[truncated: 1 more sheets: Aux_ListadoOpciones]
